# Supplementary material
Source: ML conference proceedings conference paper supplement (https://proceedings.mlr.press/v32/ermon14.html)
Supplement: Supplementary file 1 [file ermon14-supp.pdf]

## A. Appendix

### A.1. Alternative Construction

We consider a related construction where we generate each row independently by fixing exactly  $t$  randomly chosen elements to 1. In contrast, the previous construction has on average  $nf$  non-zero elements per row, but the number can vary. We can use an analysis similar to the one for Theorem 3, the main difference being that we need to substitute  $r^{(w,f)}(0,0)$  with

$$z^{(w,f)}(0,0) = \left( \sum_{\text{even } \ell}^{\min(w,t)} \frac{\binom{w}{\ell} \binom{L-w}{t-\ell}}{\binom{L}{t}} \right)^m.$$

Then we can obtain a closed form expression for  $\epsilon$  by again looking at the worst-case distribution of the neighbors in terms of Hamming distance  $w$ .

### A.2. Proofs

*Proof of Proposition 2.* Let  $i^* = \log_2 |S|$  and  $2^{\hat{i}-1}$  be the output of  $\mathcal{A}$ . We will show that  $\hat{i}$  is within  $[[i^*], [i^*] + 2]$  with probability at least  $3/4$ .

Fix any  $i \leq i^*$ . Then  $\mathbb{E}[|h_t^{-1}(0) \cap S|] = |S|/2^i \geq 1$ . Weak  $(\mu^2, 4)$ -concentration implies that  $\Pr[|h_t^{-1}(0) \cap S| = 0] \leq 1/4$ . Chernoff bound applied to the  $T$  underlying independent 0-1 indicator random variables then implies that a majority of the  $T$  sets will be empty with probability at most  $\exp(-T/8)$ . It follows that with probability at least  $(1 - \exp(-T/8))^{i^*} \geq (1 - \exp(-T/8))^n \geq 1 - n \exp(-T/8)$ , the majority of the  $T$  sets for *all*  $i \leq i^*$  will simultaneously be non-empty. Thus, for  $T \geq 8 \ln(8n)$ , we have that with probability at least  $7/8$ , all  $i \leq i^*$  will behave correctly.

Fix any  $i \geq i^* + 2$ . Here we can simply use Markov's inequality to infer that  $\Pr[|h_t^{-1}(0) \cap S| \geq 1] \leq 1/4$ . From the same Chernoff bound based argument as above, it follows that for  $T \geq 8 \ln(8n)$ , with probability at least  $7/8$ , all  $i \geq i^* + 2$  will behave correctly.

By union bound, it follows that the output  $2^{\hat{i}-1}$  of  $\mathcal{A}$  will be in the range  $[2^{\lfloor i^* \rfloor - 1}, 2^{\lfloor i^* \rfloor + 1}]$  with probability at least  $1 - 1/8 - 1/8 = 3/4$ .  $\square$

*Proof of Proposition 3.* From Chebychev's inequality,  $\Pr[|X - \mu| \geq \sqrt{\delta}\sigma] \leq \delta$ , which implies the claimed strong correlation. For showing the desired weak correlation, we use Cantelli's one-sided inequalities. For the first case,  $\Pr[X \leq \mu - \sqrt{\delta - 1}\sigma] \leq 1/(1 + (\delta - 1)) = 1/\delta$ . The second case works similarly.  $\square$

*Proof of Proposition 4.* From Chernoff's bound,  $\Pr[X \leq \mu + \sqrt{k}] = \Pr[X \leq (1 + \frac{\sqrt{k}}{\mu})\mu] \leq \exp(-\frac{k}{3\mu})$ .

Thus,  $k \geq (3 \ln \delta)\mu$  suffices to bound this probability by  $1/\delta$ . The other side,  $\Pr[X \leq \mu - \sqrt{k}]$ , similarly leads to  $k \geq (2 \ln \delta)\mu$  as the condition to bound the probability by  $1/\delta$ . Combining the two, we get the desired result for weak concentration. The result for strong concentration follows by using the union bound to obtain  $\exp(-\frac{k}{3\mu}) + \exp(-\frac{k}{2\mu})$ , which is less than  $\exp(-\frac{k}{c\mu})$  for any  $c > 3$ .  $\square$

*Proof of Proposition 5.* This follows from observing that pairwise independence implies  $\sigma^2 = |S|/2^m(1 - 1/2^m) < \mu$  and then applying Prop. 3.  $\square$

*Proof of Proposition 6.* The first two observations are straightforward. For the third, let  $S$  and  $T$  be sets with  $|T| = |S| + 1$ . Given  $y_1, y_2 \in \{0, 1\}^m$ , let  $f(x_1, x_2)$  denote  $P[H(x_1) = y_1, H(x_2) = y_2]$ . Then

$$\begin{aligned} \sum_{x,y \in T, x \neq y} f(x,y) &= \frac{1}{|T| - 2} \sum_{z \in T} \sum_{x,y \in T \setminus \{z\}, x \neq y} f(x,y) \\ &\leq \frac{1}{|T| - 2} \sum_{z \in T} |S|(|S| - 1) \frac{\epsilon}{2^m} \\ &= \frac{|T|}{|T| - 2} |S|(|S| - 1) \frac{\epsilon}{2^m} \leq |T|(|T| - 1) \frac{\epsilon}{2^m} \end{aligned}$$

This finishes the proof.  $\square$

*Proof of Lemma 1.* By Theorem 3, the hash functions  $h_{A,b}^i$  from  $\mathcal{H}^{f^*}$  in the inner loop at iteration  $i$  are  $(\epsilon, 2^{i+2})$ -AU, with  $\epsilon < \frac{31}{5(2^{i+2}-1)}$  by construction.

Let  $S = \{\sigma_1, \sigma_2, \dots, \sigma_{2^{i+2}}\}$ ,  $X = |(h_{A,b}^i)^{-1}(\mathbf{0}) \cap S|$ . Notice  $|S| = 2^{i+2}$  and  $\mathbb{E}[X] = 2^{i+2}/2^i = 4$ .

By Corollary 1 and Theorem 2,  $X$  is weakly  $(\mu^2, 9/4)$ -concentrated.

Then by weak concentration

$$\begin{aligned} \Pr[w_i \geq b_{i+2}] &= \Pr[w_i \geq w(\sigma_{2^{i+2}})] \geq \Pr[X \geq 1] \\ &= 1 - \Pr[X \leq 0] \geq 1 - 4/9 = 5/9 \end{aligned}$$

Similarly, we have from Markov's inequality

$$\Pr[w_i \leq b_{i-2}] \geq 3/4 \geq 5/9.$$

Finally, using Chernoff inequality (since  $w_i^1, \dots, w_i^T$  are i.i.d. realizations of  $w_i$ )

$$\Pr[M_i \leq b_{i-2}] \geq 1 - \exp(-\alpha'T) \quad (3)$$

$$\Pr[M_i \geq b_{i+2}] \geq 1 - \exp(-\alpha'T) \quad (4)$$

where  $\alpha' = 2(5/9 - 1/2)^2$ , which gives the desired result

$$\begin{aligned} \Pr [b_{i+2} \leq M_i \leq b_{i-2}] &\geq 1 - 2 \exp(\alpha'T) \\ &= 1 - \exp(-\alpha^*T) \end{aligned}$$

where  $\alpha^* = \ln 2\alpha' = 2(5/9 - 1/2)^2 \ln 2 > 0.0042$   $\square$

### A.3. Additional Experiments

We report additional experimental results for mixed interaction Ising grids in Figure 4 with the same setup as in Section 7 but with external field 1.0 rather than 0.1.

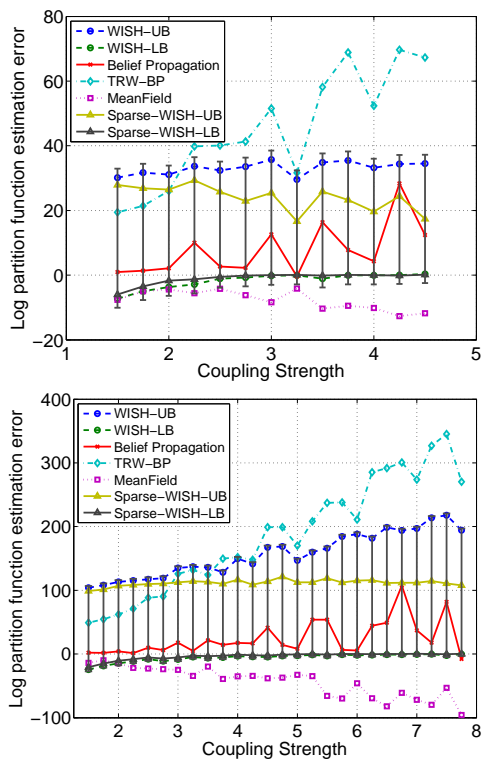

Figure 4. Results on Ising grids with mixed interactions. Top: Mixed  $10 \times 10$ . Field 1.0. Bottom: Mixed  $15 \times 15$ . Field 1.0.
